# Supplementary material
Source: Research Square preprint supplement (doi:10.21203/rs.3.rs-9658036/v1)
Supplement: Supplementary file 1 [file 028ad671c95958384166247e.xlsx]

## Sheet: Main Table 1
Characteristic	Category	n	%
Gender	male	186	44.6
Gender	female	231	55.4
Location	Urban	353	84.7
Location	Rural	64	15.3
Original living before the war	Yes	182	43.6
Original living before the war	No	235	56.4
Current living situation	Home with family	215	51.6
Current living situation	Shelter/Refugee	45	10.8
Current living situation	Displaced (Temporary living)	149	35.7
Current living situation	Sharing House	2	.5
Current living situation	Outside Sudan Refugee	1	.2
Current living situation	Alone	2	.5
Current living situation	Other	3	.7
Education level	Illiterate	63	15.1
Education level	Read and write	33	7.9
Education level	Primary school	59	14.1
Education level	Intermediate	21	5.0
Education level	Sec sch	45	10.8
Education level	University	120	28.8
Education level	Post-G	76	18.2

## Sheet: Main Table 2
Exposure or condition	Category	n	%
Access to clean water and sanitation	Adequate	121	29.0
Access to clean water and sanitation	Somewhat adequate	171	41.0
Access to clean water and sanitation	Inadequate	125	30.0
Dusty living environment	yes	224	53.7
Dusty living environment	No	193	46.3
Dirty living environment	yes	317	76.0
Dirty living environment	No	100	24.0
Crowded environment	yes	223	53.5
Crowded environment	No	194	46.5
Contact with anyone who has symptoms of keratoconjunctivitis	yes	353	84.7
Contact with anyone who has symptoms of keratoconjunctivitis	No	64	15.3
Attended gathering or events	Yes	132	31.7
Attended gathering or events	No	285	68.3

## Sheet: Main Table 3
Clinical feature	Category	n	%
Redness of the eye	Yes	373	89.4
Itching or Burning sensation	Yes	393	94.2
Eye pain	Yes	263	63.1
Foreign body Sensation	Yes	338	81.1
Sensitivity to light	Yes	172	41.2
Blurred vision	Yes	89	21.3
Lid oedema	yes	250	60.0
Discharge	yes	215	51.6
Conjunctival injection	yes	162	38.8
Subconjunctival injection	yes	149	35.7
Follicles papillae	yes	130	31.2
Punctate keratitis	yes	46	11.0
Periauricular LN	yes	75	18.0
Membrane	yes	16	3.8

## Sheet: Main Table 4
Variable	Category	n	%
Final diagnosis	NA	10	2.4
Final diagnosis	Adenoviral KC	122	29.3
Final diagnosis	ID Know	1	.2
Final diagnosis	Allergic KC	3	.7
Final diagnosis	Allergic rhinitis	1	.2
Final diagnosis	Episcleritis	1	.2
Final diagnosis	Bacterial KC	89	21.3
Final diagnosis	Bacterial on top of viral KC	183	43.9
Final diagnosis	Post KC iris prolapse	1	.2
Final diagnosis	///	5	1.2
Final diagnosis	Ruptured globe	1	.2
Avoid eye rubbing preventive measure	Yes	170	40.8
Avoid eye rubbing preventive measure	No	247	59.2
Not share personal items preventive measure	Yes	135	32.4
Not share personal items preventive measure	No	282	67.6
Frequent hand washing preventive measure	Yes	288	69.1
Frequent hand washing preventive measure	No	129	30.9
Wearing glass to protect the eyes preventive measure	Yes	76	18.2
Wearing glass to protect the eyes preventive measure	No	341	81.8

## Sheet: Main Table 5
Grouping variable	Outcome	Group medians [IQR]	Test	U	p	H
Gender	Symptom Score	Male n=186: 5.00 [4.00, 6.75]; Female n=231: 6.00 [4.00, 7.00]	Mann-Whitney U	19458.50
Gender	Clinical Sign Score	Male n=186: 2.00 [1.00, 3.00]; Female n=231: 2.00 [1.00, 3.00]	Mann-Whitney U	21284.00
Gender	Recovery Days	Male n=88: 5.50 [4.00, 7.00]; Female n=96: 6.00 [4.00, 7.00]	Mann-Whitney U	4232.50
Location	Prevention Score	Urban n=353: 1.00 [1.00, 2.00]; Rural n=64: 1.00 [0.00, 1.25]	Mann-Whitney U	15094.00	< .001
Location	Impact Score	Urban n=353: 2.00 [1.00, 2.00]; Rural n=64: 1.00 [1.00, 2.00]	Mann-Whitney U	13045.00
Access to clean water and sanitation in your current living condition	Symptom Score	Adequate n=121: 4.00 [2.00, 6.00]; Somewhat adequate n=171: 5.00 [4.00, 7.00]; Inadequate n=125: 6.00 [5.00, 8.00]	Kruskal-Wallis		< .001	76.24
Access to clean water and sanitation in your current living condition	Clinical Sign Score	Adequate n=121: 1.00 [0.00, 1.00]; Somewhat adequate n=171: 2.00 [1.00, 4.00]; Inadequate n=125: 2.00 [1.00, 4.00]	Kruskal-Wallis		< .001	58.40
Access to clean water and sanitation in your current living condition	Recovery Days	Adequate n=79: 6.00 [4.00, 7.00]; Somewhat adequate n=73: 5.00 [4.00, 7.00]; Inadequate n=32: 6.00 [4.00, 10.00]	Kruskal-Wallis			3.70
contact with anyone who has symptoms of keratoconjunctivitis	Symptom Score	Yes n=353: 5.00 [4.00, 7.00]; No n=64: 4.00 [2.00, 6.00]	Mann-Whitney U	15581.00	< .001
contact with anyone who has symptoms of keratoconjunctivitis	Clinical Sign Score	Yes n=353: 2.00 [1.00, 3.00]; No n=64: 1.00 [0.00, 1.25]	Mann-Whitney U	15554.50	< .001
Have you had any recent URTI/Symptoms	Symptom Score	Yes n=274: 5.00 [4.00, 7.00]; No n=143: 5.00 [3.50, 7.00]	Mann-Whitney U	21164.50
Have you had any recent URTI/Symptoms	Impact Score	Yes n=274: 1.00 [1.00, 2.00]; No n=143: 1.00 [1.00, 2.00]	Mann-Whitney U	20501.00

## Sheet: Main Table 6
Predictor	B	SE	OR	95% CI for OR	z	p
Age	-0.014	0.009	0.99	[0.97, 1.00]	-1.53
Female gender	-0.390	0.338	0.68	[0.35, 1.31]	-1.15
Urban residence	1.256	0.446	3.51	[1.47, 8.42]	2.82
Inadequate clean water/sanitation	2.289	0.709	9.87	[2.46, 39.62]	3.23
Contact with KC patient	0.017	0.415	1.02	[0.45, 2.29]	0.04
Recent URTI symptoms	0.651	0.352	1.92	[0.96, 3.82]	1.85
Dusty environment	-0.499	0.356	0.61	[0.30, 1.22]	-1.40
Crowded environment	0.878	0.388	2.41	[1.12, 5.14]	2.26
Symptom score	-0.243	0.108	0.78	[0.63, 0.97]	-2.26
Clinical sign score	0.025	0.116	1.03	[0.82, 1.29]	0.21
Preventive practice score	0.586	0.195	1.80	[1.23, 2.63]	3.01

## Sheet: Reliability
Scale	Items	N	Cronbach alpha	M	SD	Observed range
Symptom severity score	10	417	0.666	5.20	2.09	0-9
URTI symptom score	6	417	0.558	0.05	0.30	0-3
Preventive practice score	5	417	0.248	1.61	1.02	0-4
Psychosocial/economic impact score	4	417	0.275	1.62	1.09	0-4
Clinical sign score	8	417	0.734	2.18	1.95	0-7

## Sheet: Normality
Variable	N	M	SD	Mdn	IQR	W	p
Age	409	30.68	18.94	27.00	17.00-43.00	0.963	< .001
BMI	252	24.11	5.28	23.65	20.80-27.07	0.956	< .001
Symptom score	417	5.20	2.09	5.00	4.00-7.00	0.963	< .001
Clinical sign score	417	2.18	1.95	2.00	1.00-3.00	0.881	< .001
Preventive practice score	417	1.61	1.02	1.00	1.00-2.00	0.838	< .001
Psychosocial/economic impact score	417	1.62	1.09	1.00	1.00-2.00	0.900	< .001
Recovery days	184	6.09	3.17	6.00	4.00-7.00	0.909	< .001

## Sheet: Correlations
Variable	Age	BMI	Symptom score	Clinical sign score	Prevention score	Impact score	Recovery days
Age	—
BMI	.28**	—
Symptom score	.07	.12	—
Clinical sign score	.11*	.13*	.59**	—
Prevention score	.16**	.03	-0.01	.03	—
Impact score	.10*	.12	.36**	.38**	.26**	—
Recovery days	.13	.08	.00	.13	-0.07	.06	—

## Sheet: Complications regression
Predictor	B	SE	OR	95% CI for OR	z	p
Intercept	-0.262	0.974	0.77	[0.11, 5.19]	-0.27
Age	-0.007	0.013	0.99	[0.97, 1.02]	-0.55
Female gender	-0.302	0.420	0.74	[0.32, 1.68]	-0.72
Urban residence	-0.277	0.576	0.76	[0.25, 2.34]	-0.48
Inadequate clean water/sanitation	-1.559	0.875	0.21	[0.04, 1.17]	-1.78
Contact with KC patient	0.449	0.571	1.57	[0.51, 4.80]	0.79
Recent URTI symptoms	-0.224	0.469	0.80	[0.32, 2.00]	-0.48
Dusty environment	-0.548	0.454	0.58	[0.24, 1.41]	-1.21
Crowded environment	-0.172	0.451	0.84	[0.35, 2.04]	-0.38
Symptom score	-0.048	0.127	0.95	[0.74, 1.22]	-0.38
Clinical sign score	0.217	0.144	1.24	[0.94, 1.65]	1.51
Preventive practice score	-0.398	0.229	0.67	[0.43, 1.05]	-1.74

[truncated: 1 more sheets: Recovery days regression]
